# Supplementary material
Source: PubMed Central journal article supplement (PMC5311418)
Supplement: AEM.02751-16_zam999117691s1.pdf [file AEM.02751-16_zam999117691s1.pdf]

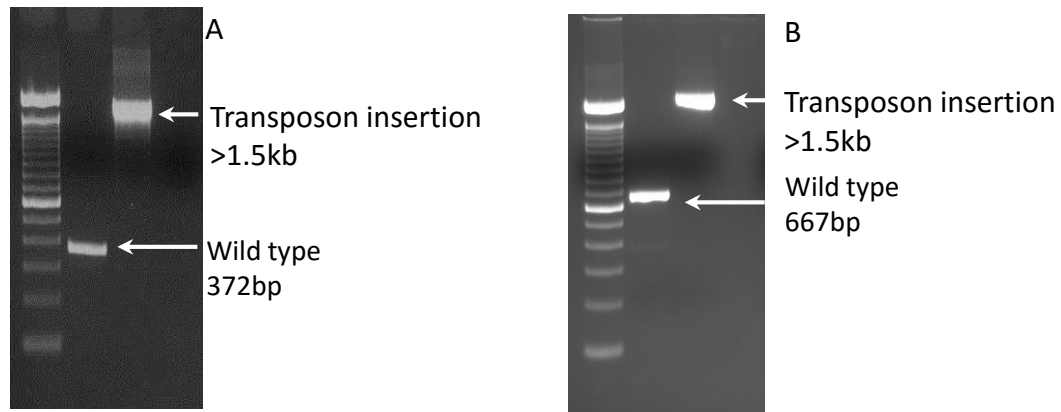

### Supplementary Figure 1

Gel picture of transposon insertions. PCR amplification using flanking primers across (A) Clo1313\_0145 using gDNA isolated from the parental and mutant ( $\Delta$ Clo1313\_0089) strains and (B) Clo1313\_1891 using gDNA isolated from the parental and mutant ( $\Delta$ Clo1313\_2023) strains

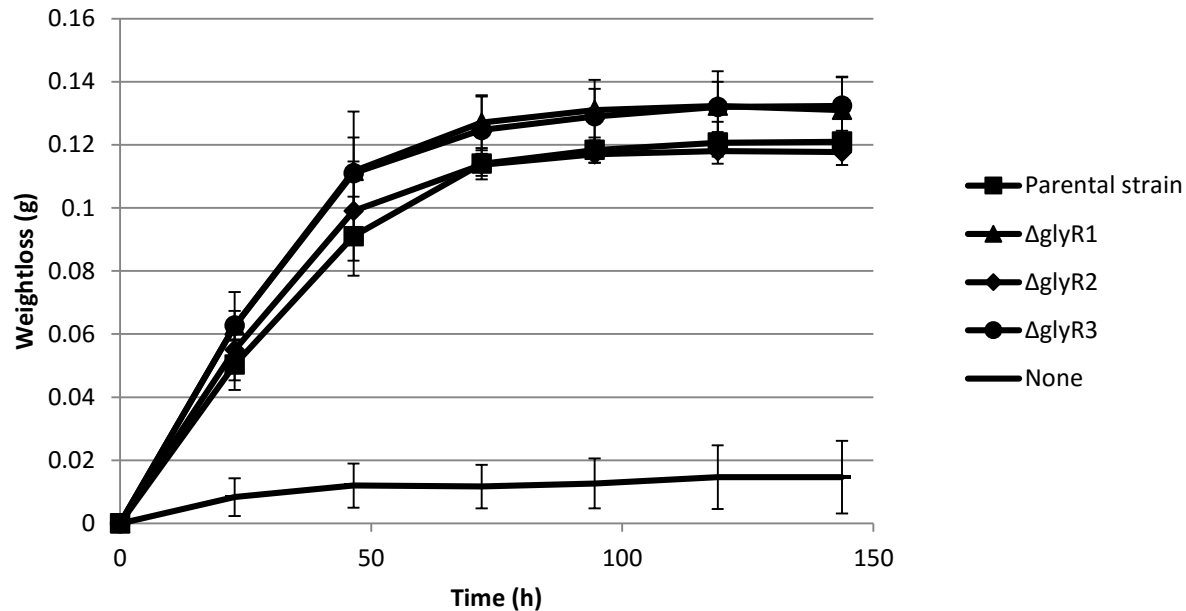

Supplementary Figure 2. Growth of the parental and mutant strains on pretreated switchgrass. Growth measured by weight loss from venting gasses every 24 hours. Plotted are the average weight loss values in g of triplicate fermentations. Error bars are the standard deviation of the three replicates.

Fig. S3. RNA-seq analysis for  $\Delta$ glyR2 region for mutant and parent strains. Reads from the parent and deletion strains were mapped to the genome.

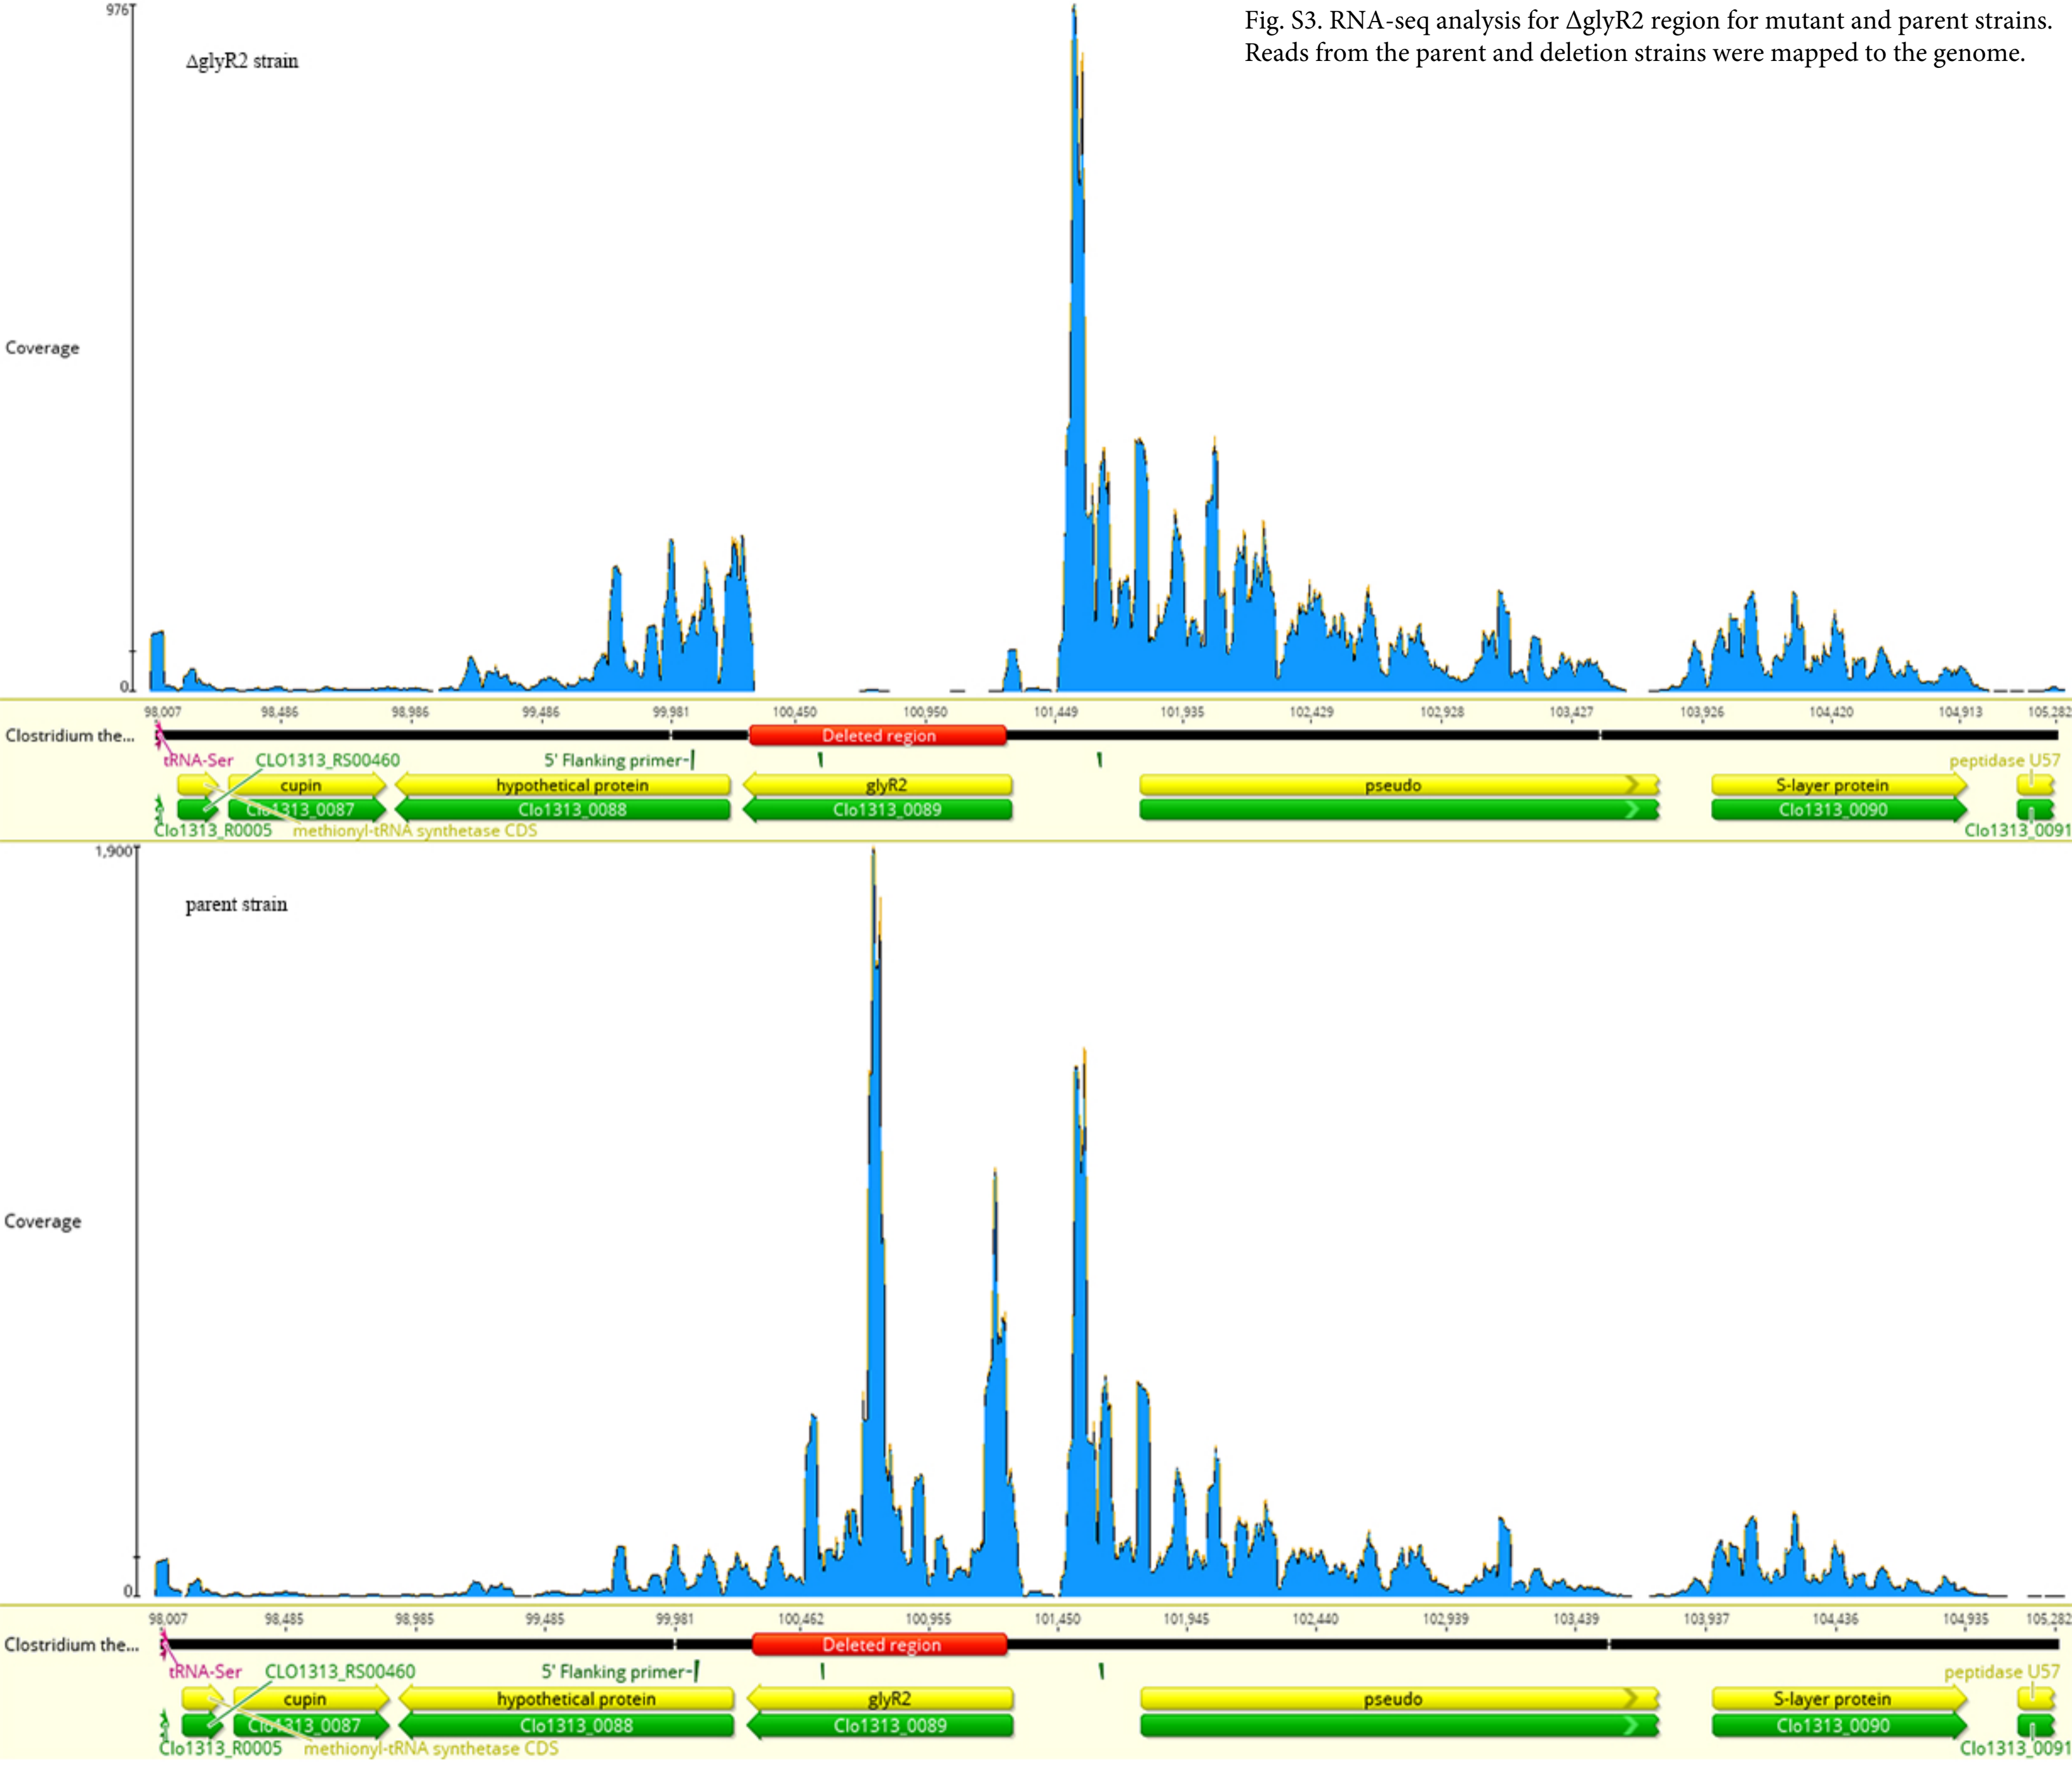

LOCUS pCS6 11455 bp DNA circular 20-JUL-2015  
 SOURCE  
 ORGANISM  
 COMMENT This file is created by Vector NTI  
 http://www.invitrogen.com/  
 COMMENT VNTDATE|739731902|  
 COMMENT VNTDBDATE|739963549|  
 COMMENT LSOWNER|  
 COMMENT VNTNAME|pCS6|  
 COMMENT VNTAUTHORNAME|Adam Guss|  
 COMMENT VNTAUTHORTEL|865-576-0814|  
 COMMENT VNTAUTHOREML|gussam@ornl.gov|  
 FEATURES Location/Qualifiers  
     CDS 523..831  
         /codon\_start=1  
         /transl\_table=11  
         /product="glycosyltransferase"  
         /protein\_id="YP\_001036643.1"  
         /db\_xref="GI:125972733"  
         /db\_xref="InterPro:IPR001173"  
         /db\_xref="GeneID:4808627"  
         /locus\_tag=CDS\_200  
         /vntifkey="4"  
         /label=Cthe\_0209  
         /note="KEGG: mma:MM0652 glycosyltransferase"  
     gene 523..831  
         /db\_xref="GeneID:4808627"  
         /vntifkey="60"  
     misc\_feature 3947..3950  
         /vntifkey="21"  
         /label=loop\of\t1t2  
     CDS 2701..3351  
         /vntifkey="4"  
         /label=cat  
     promoter 2053..2700  
         /vntifkey="30"  
         /label=P-gapD  
         /note="gapD promoter from C. thermocellum"  
     gene 3369..3914  
         /locus\_tag="or0940"  
         /colour=16  
         /vntifkey="60"  
     gene complement(5948..6526)  
         /locus\_tag="or0326"  
         /colour=16  
         /vntifkey="60"  
     CDS complement(5948..6526)  
         /locus\_tag="or0326"  
         /product="Thymidine kinase"  
         /EC\_number="2.7.1.21"  
         /codon\_start=1  
         /transl\_table=11

```

        /colour=16
        /vntifkey="4"
        /label=tdk
        /note="CDS 326 - PRIAM: Thymidine kinase PFAM:
thymidine kinase SPTR: Q3CIU6 Thymidine kinase (EC 2.7.1.21).
Thermoanaerobacter pseudethanolicus ATCC 33223. KEGG: tpd:Teth39_2112
thymidine kinase COGs: COG1435 Thymidine kinase category=F
InterPro IPR001267"
    rep_origin      10783..11301
                    /vntifkey="33"
                    /label=CEN6/ARSH4
                    /note="Yeast origin of replication"
    CDS              complement(9663..10770)
                    /vntifkey="4"
                    /label=URA3
                    /note="yeast gene URA3, which results in ura+, 5-
FOA(Sensitive) when present"
    CDS              complement(8785..9645)
                    /vntifkey="4"
                    /label=bla
                    /note="b-lactamase = ampR"
    rep_origin      5214..5887
                    /vntifkey="33"
                    /label=pUC\origin
    terminator      4777..5030
                    /vntifkey="43"
                    /label=CYC1\term
    CDS              complement(8356..8604)
                    /vntifkey="4"
                    /label=putative\mob/pre\fragment
                    /note="cds homologous to a fragment of mob/pre
plasmid proteins involved in mobilization and recombination."
    CDS              complement(7223..8227)
                    /gene="repB"
                    /codon_start=1
                    /transl_table=11
                    /product="RepB"
                    /protein_id="AA086061.1"
                    /db_xref="GI:29650180"
                    /vntifkey="4"
                    /label=repB
                    /note="replication protein; rolling circle
replication initiation protein; Bacillus origin of replication from
Geobacillus stearothermophilus plasmid pTHT15"
    gene            complement(7223..8227)
                    /gene="repB"
                    /vntifkey="60"
    rep_origin      7148..8682
                    /vntifkey="33"
                    /label=putative\minimal\C.\thermocellum\ori
                    /note="region of pNW33N that is conserved in
pMU770"

```

```

promoter      complement(6527..7147)
              /vntifkey="30"
              /label=P-cbp
              /note="cbp promoter as used by Mascoma (i.e.,
Dan)"
misc_feature  1..1005
              /vntifkey="21"
              /label=Clo1313_2023\upstream\region
misc_recomb   1006..2040
              /vntifkey="86"
              /label=Clo1313_2023\downstream\region
misc_feature  3987..4736
              /vntifkey="21"
              /label=Clo1313_2023\internal\region
              /note="region of homology for deletion. Lacks
HTH"
CDS           3369..3914
              /locus_tag="or0940"
              /product="hypoxanthine phosphoribosyltransferase"
              /EC_number="2.4.2.8"
              /codon_start=1
              /transl_table=11
              /colour=16
              /vntifkey="4"
              /label=hpt
              /note="From Thermoanaerobacterium saccharolyticum
- TIGRFAM: hypoxanthine phosphoribosyltransferase PRIAM: Hypoxanthine
phosphoribosyltransferase PFAM: phosphoribosyltransferase SPTR:
Q3CID6 Hypoxanthine phosphoribosyl transferase (EC 2.4.2.8).
Thermoanaerobacter pseudethanolicus ATCC 33223. KEGG: tpd:Teth39_0300
hypoxanthine phosphoribosyltransferase COGs: COG0634 Hypoxanthine-
guanine phosphoribosyltransferase category=F InterPro
IPR000836:IPR002375:IPR005904"
BASE COUNT   3419 a      2232 c      2139 g      3665 t
ORIGIN
    1 acccctgcga atactgagat tttcaagag gttattgccc ttgccaatcc
agaaaaggtg
    61 ataataaatt ttgccgtcct ttcgaactat acctttaag gctttgtatt
aaaccttttg
    121 gggcttataa agcacataat aaagagacgg gacggaagag cttatattga
tgagctttct
    181 ttgaagcttt gcgttgagga gaacattgta aaagcgggat taaaatatct
tggctcttct
    241 ggaatgtaa actatacttt aagtgcgat gagcaaaaag tttatttgtc
tgaaggaaaa
    301 ggtgtggctg acagaaatgc ttttatggcg aaaaaaacc tttccgacgc
tttggcgtaa
    361 aagaatgcct atcagcagtt tattttaag atggagatag ataaattcag
ggaatatctt
    421 aagtaattcg gttaagtgat gcaaaaatag cgttcttccg tcatatccgc
cttcttttat

```

481 tactttttaca acaccgttta attcctcttt gatattttca aatgtatga  
taaaccgtta  
541 gttagtgtta tcataccgac atttaacagg gaaaagctgt tacctaaaac  
cattgattca  
601 gttataaatc agacctatga aaactgggaa ttgttgattg tggatgacaa  
gagtactgat  
661 gatacaaaaa aagtagttat ggattatgca aaaaagata ataggatcaa  
atacttacta  
721 aataacggaa ataagggccc cggtgctgcc agaaattttg gaatcaataa  
ttgtaatggg  
781 aagtatattg cgtttttaga ttcagatgat caatggtaa aaaatcatta  
gagatcaatt  
841 tcatggcctt catgttgaac tgcttaaaca taagtttggg tatttttgca  
ataaacggta  
901 agttataaaa agtggcttgt atcctttaa cgccagattt tatatttcac  
cgtaagaaca  
961 aacgaagctg tttttgaaaa atacaaagaa aactgatttg tctcaactta  
aatcagcct  
1021 ttttaagtaa gaatagcact gatacgaaaa tttatcaagt ggttttactg  
tttctggata  
1081 tattgaaaat aatttgaatt ttttgcaggt caagaattta gaatgatatt  
ctttttatc  
1141 taggcttggg tttagttgac aatctgaagt ttataggata taattaaatc  
gaattaacgc  
1201 gtgtttagtg cttaaaatac agggtttgac gtttatatat atttcttga  
attgttacag  
1261 gagctttgct gaagtgttaa tttttaccgc cgctaaagta taaaaatata  
ttttatttat  
1321 attattttac gggaggtatt ttttatgaaa aacagggtaa tttcattatt  
aatggcttcc  
1381 ttgcttttgg ttttgtcggg aattgttgct cttttttaca aagcgggaagc  
cgcaactgtg  
1441 gtaaatacgc cttttgttgc agtgttttcg aactttgact ccagtcagtg  
ggaaaaagcg  
1501 gattgggcca acggttcggg gttcaactgt gtttgggaagc cttcacaggt  
gacattttcg  
1561 aacggtaaaa tgattttgac ccttgacagg gaatatggcg gttcatatcc  
gtataaaagc  
1621 ggtgaatatc gtacaaaatc atttttcggg tacggttatt atgaagtaag  
aatgaaagct  
1681 gccaaaaacg taggaattgt ttcacttttc ttcacttata caggaccttc  
ggacaacaat  
1741 ccatgggacg aaatcgatat cgagttttta ggaaaggaca caactaaagt  
tcagttcaac  
1801 tgggtacaaaa atggagtcgg tggaaacgag tatttgcaca atcttggatt  
cgatgcttcc  
1861 caggattttc atacatatgg atttgaatgg aggccggatt atatagactt  
ctatgttgac  
1921 ggcaaaaaag tttatcgtgg aaccaggaac atacctgtta ctcccggcaa  
aattatgatg  
1981 aatttgtggc caggaatagg agtggatgaa tggttgggac gttacgacgg  
aagaactcct

2041 tcgcgaggcc ggccagtatt ctgacatggg tgtatcaata acccatgcgt  
ttccgtattg  
2101 tatcggaatg gtttcggaca gggcgggagg aatagacatg gaaaagattt  
ttttgcccga  
2161 ggatgcattg ataaagtatt tcttttccga aagagaggaa aagattctaa  
agagttttgg  
2221 aaatactgat gaatattgtg tgcagagtac aattctatgg acaagaaaag  
aggctttgtc  
2281 aaaacttttt cgtctgggaa tgaggatgga ttttaaaaag ctggatactt  
tggaggacga  
2341 ggtggttttt caggaaacaa acagggcgcg tctgttttct tttatatgca  
ataattactg  
2401 tatctctctg gcattgccag gttttaataa agattaaaat tattgactag  
aaataaaaaa  
2461 attgtccata atattaatgg acaaaaaaac aaagaattac atcaaaggaa  
gataaaaata  
2521 ctttgtaaaa aaattaatta ttttttatct aaactattga aatgaaaat  
aaaataatat  
2581 aaaatgaatc atagtgcaag agatacttgc cagaggatga atattttact  
gcattcatgc  
2641 tttatggcag ctaatagagg cattaatta aattttaatt tacaatagga  
ggcgatatta  
2701 atgaacttta ataaaattga tttagacaat tggaagagaa aagagatatt  
taatcattat  
2761 ttgaaccaac aaacgacttt tagtataacc acagaaattg atattagtgt  
tttataccga  
2821 aacataaaac aagaaggata taaattttac cctgcattta ttttcttagt  
gacaaggggtg  
2881 ataaactcaa atacagcttt tagaactggg tacaatagcg acggagagtt  
aggttattgg  
2941 gataagttag agccacttta tacaattttt gatgggtgat ctaaaacatt  
ctctggtatt  
3001 tggactcctg taaagaatga cttcaaagag ttttatgatt tatacctttc  
tgatgtagag  
3061 aaatataatg gttcggggaa attgtttccc aaaacaccta tacctgaaaa  
tgctttttct  
3121 ctttctatta ttccatggac ttcatttact gggtttaact taaatatcaa  
taataatagt  
3181 aattaccttc taccattat tacagcagga aaattcatta ataaaggtaa  
ttcaatatat  
3241 ttaccgctat ctttacaggt acatcattct gtttgtgatg gttatcatgc  
aggattgttt  
3301 atgaactcta ttcaggaatt gtcagatagg cctaatact ggcttttata  
ataaaggagg  
3361 tcgacgtcat ggaaaattta tcaaaagaca tcgatgaaat tttgatcaca  
gaagaagaac  
3421 ttaaggaaaa gataaaagag cttgggaggc aatcacaaa agactacaaa  
gggaaaaatt  
3481 tgatgttggt aggagtttta aaaggtgctt taatgtttat ggctgatttg  
tcaagacaca  
3541 tagatttgcc tttatcactt gattttatgg ctgtttccag ctatggaagc  
tcaactcatt



3601 catcaggaat agtaaagata atcaaagatc ttgatataag catagaaggc  
aaagatgttc  
3661 tgattgtgga agacataatt gacagcgggt tgactttgtc ttacttaagg  
gaaactttac  
3721 ttggaaggaa gccaaaaagc ctgaaaatat gcacaatatt agacaaaccg  
gagagaagag  
3781 aagcatctgt aaaagtcgat tatgtaggat ttaagatacc tgataagttt  
gtcgtgggtt  
3841 atggattgga ctttgatgaa aagtacagga accttccttt tataggcggt  
ttgaaacctg  
3901 aaatgtacag ctaagcccgg gcctcgagaa aacaaaaggc tcagtcggaa  
gactgggcct  
3961 tttgttttgg taccgaattc ggcgcgtcaa tcgagcattt tgctatctca  
ggcaatgaaa  
4021 cattgactgt ggtaagaggc ggggacatgt attgggatat atatgaattg  
tcgaatccca  
4081 taaccgaaat atcctccgga attttaagcc cgtattcctt tattgccctg  
tatgctccga  
4141 tagccatggt atcattgctt gtaaatacgg ctggtggctt tttccggat  
gccaatattt  
4201 ttttcatacc ctcatagccg ctattttcag taaaatcccc atatgcaata  
aaatcattgt  
4261 ttaacggaag gccgtgcctt aaaagcgcgcat ctttgaagct ttcaaatctt  
atcttaccag  
4321 aaagcttggt cagatctcct gtaattacgg caatgtcttt gtgcccagt  
tcaacaagat  
4381 aatctattgc atcggataca ccgccataat tattgatatt tacagacatg  
actgtgctg  
4441 tattttcttt ttccatatct aaatcaactg cgacagtaat agaatcttta  
tccattattt  
4501 caaaaatttt actataatca atgctgctgc ttctattat caccgcaccg  
tcaattcttt  
4561 tctcataaaa agcgctttga atcttccaaa gctcatccga actgtatata  
gttgacacca  
4621 aaacgtggta ctgggctttg tttgactggt caataaaagc atttataaaa  
ggtgaaaaat  
4681 atgaattgcc gtataaaagg tcttcattat tttctattac atggtgcggt  
ttttcacgcg  
4741 cctcagcgtt taaaccgct gatcctagag ggccgcatca tgtaattagt  
tatgtcacgc  
4801 ttacattcac gccctcccc cacatccgct ctaaccgaaa aggaaggagt  
tagacaacct  
4861 gaagtctagg tccctattta tttttttata gttatgtag tattaagaac  
gttatttata  
4921 tttcaaattt ttctttttt tctgtacaga cgcgtgtacg catgtaacat  
tatactgaaa  
4981 acctgcttg agaaggtttt gggacgctcg aaggctttaa tttgcaagct  
gcggccctgc  
5041 attaatgaat cggccaacgc gcggggagag gcggtttgcg tattgggagc  
tcttccgctt  
5101 cctcgctcac tgactcgctg cgctcggtcg ttcggctgcg gcgagcggta  
tcagctcact

5161 caaaggcggg aatacgggta tccacagaat caggggataa cgcaggaaag  
aacatgtgag  
5221 caaaaggcca gcaaaagccc aggaaccgta aaaaggccgc gttgctggcg  
ttttccata  
5281 ggctccgccc ccctgacgag catcacaaaa atcgacgctc aagtcagagg  
tggcgaaacc  
5341 cgacaggact ataaagatac caggcgtttc ccctggaag ctccctcgtg  
cgctctcctg  
5401 ttccgaccct gccgcttacc ggatacctgt ccgcctttct cccttcggga  
agcgtggcgc  
5461 tttctcatag ctcacgctgt aggtatctca gttcggtgta ggtcgttcgc  
tccaagctgg  
5521 gctgtgtgca cgaaccccc gttcagccc accgctgcgc cttatccggt  
aactatcgtc  
5581 ttgagtccaa cccggtaga cacgacttat cgccactggc agcagccact  
ggtaacagga  
5641 ttagcagagc gaggtatgta ggcggtgcta cagagttctt gaagtgggtg  
cctaactacg  
5701 gctacactag aaggacagta tttggtatct gcgctctgct gaagccagtt  
accttcggaa  
5761 aaagagttgg tagctcttga tccggcaaac aaaccaccgc tggtagcggg  
ggtttttttg  
5821 tttgcaagca gcagattacg cgcagaaaaa aaggatctca agaagatcct  
ttgatctttt  
5881 ctacggggtc tgacgctcag tggaacgaaa actcacgtta agggattttg  
gtcatgaaaa  
5941 aatccgctta agtccgctgg acttcatggc actttctaca cttgcttca  
taagactcct  
6001 ttgctccaac cattataatg ggatcgtcgt aattggcagg cttcccattt  
ataagccttt  
6061 gcgtgcgagt agcaggattg ccacacttca tgcatatagc agtaagctta  
tcgacaaatt  
6121 cagctatggc catcaattct ggagtcggac caaatgggtc acctctaaag  
tccatgtcaa  
6181 gccctgcaca tatgactctt ttcccgtat cggcaatctc ttttacgatg  
tcgactattt  
6241 cagaatcaaa aaattgaact tcatctatag caaatacatc cgtatcttct  
tcagcataag  
6301 ccaatatgtc agaagccttt actatggcaa tggcgtgcat gttgtcggc  
ttatgagata  
6361 cgactttgtc tatggaatac ctatcgtcta tagccgggtt gaaaacctga  
actttttgcc  
6421 tggcaatctt agctctcttt atccttctta taagttcctc actttttcca  
ctgaacatgg  
6481 gaccagttac aacttctatg taccctgggt cttaggccc atacatcttt  
cgtcctcctt  
6541 aaaatthtcg tttatthgtt tttatthtag tgtgcctaaa agcaccatct  
tatacatc  
6601 taccttatat ctcttatctt gtatctctta cctcatatct cttattatta  
actaccgaag  
6661 tatatthtca taacggaatc ttatgactta tttttctgac tgccgtthta  
ccatacgggt

6721 aatattatcg gaaacagcta atctaaccctt gctgaaggca tgtttaccaa  
aatattatat  
6781 ctactttacc atattaatcc aagtggtcat tttgatattt tacgccaaaa  
tttttagcgt  
6841 tcctttactt gataatttat ccaaaaacct tcattcgtca aaacaattat  
gatataatta  
6901 atttatgata tgattaatta atatttacgg ataactaatc atttcaatgc  
aatagatcaa  
6961 catgcaaac aatatccacc ttactccgaa cattttgcac caacgaatgc  
ccagactat  
7021 atcccggcaa gcaatataac gtctataatt ttttatgata acgataaaat  
taaattttat  
7081 gaaaggggta aaagcatgag aaaaatagct gtattgttaa ttactttgac  
gttcttagtc  
7141 acgactcgaa tttaggagcc ttacttgtct gctttcttca ttagaatcaa  
tcctttttta  
7201 aaagtcaatc ccgtttggtg aactactctt taataaaata atttttccgt  
tcccaattcc  
7261 acattgcaat aatagaaaat ccatcttcat cggctttttc gtcacatct  
gtatgaatca  
7321 aatcgccttc ttctgtgtca tcaaggttta attttttatg tatttctttt  
aacaaccac  
7381 cataggagat taacctttta cggtgtaaac cttcctcaa atcagacaaa  
cgtttcaaat  
7441 tcttttcttc atcatcggtc ataaaatccg tatcctttac aggatatttt  
gcagtttcgt  
7501 caattgccga ttgtatatcc gatttatatt tatttttcgg tcgaatcatt  
tgaactttta  
7561 catttgatc atagtctaatt ttcatgctt ttttccaaaa ttgaatccat  
tgttttgat  
7621 tcacgtagtt ttctgtatcc ttaaaataag ttggtccac acataccaat  
acatgcatgt  
7681 gctgattata agaattatct ttattattta ttgtcacttc cgttgcacgc  
ataaaccaa  
7741 caagattttt attaattttt ttatattgca tcattcggcg aaatccttga  
gccatatctg  
7801 acaaactctt atttaattct tcgccatcat aaacattttt aactgttaat  
gtgagaaaca  
7861 accaacgaac tgttggcttt tgtttaataa cttcagcaac aaccttttgt  
gactgaatgc  
7921 catgtttcat tgctctcttc cagttgcaca ttggacaaag cctggattta  
caaaaccaca  
7981 ctcgatacaa ctttctttcg cctgtttcac gattttgttt atactctaatt  
atctcagc  
8041 aatcttttac tctttcagcc tttttaaatt caagaatatg cagaagttca  
aagtaatcaa  
8101 cattagcgtat tttcttttct ctccatggtc tcacttttcc actttttgtc  
ttgtccacta  
8161 aaacccttga tttttcatct gaataaatgc tactattagg acacataata  
ttaaagaaa  
8221 cccccatcta tttagttatt tgtttgggtca cttataactt taacagatgg  
ggtttttctg

8281 tgcaaccaat ttttaaggggtt ttcaatactt taaaacacat acataccaac  
acttcaacgc  
8341 accttttcagc aactaaaata aaaatgacgt tatttctata tgtatcaaga  
atagaaagaa  
8401 ctcggttttc gctacgctca aaacgcaaaa aaagcactca ttcgagtgct  
ttttcttatac  
8461 gctccaaatc atgcgatttt ttctcttttg cttttctttg ctacgaagt  
tctcgatcac  
8521 gctgcaaac atcttgaagc gaaaaagtat tcttcttttc ttccgatcgc  
tcatgctgac  
8581 gcacgaaaag ccctctaggc gcataggaac aactcctaaa tgcattgtgag  
gggttttctc  
8641 gtccatgtga acagtcgcat acgcaatatt ttgtttccca tagcggccgc  
gattatcaaa  
8701 aaggatcttc acctagatcc ttttaaatta aaaatgaagt tttaaataca  
tctaaagtat  
8761 atatgagtaa acttggctctg acagttacca atgcttaatc agtgaggcac  
ctatctcagc  
8821 gatctgtcta tttcgttcat ccatagttgc ctgactcccc gtcgtgtaga  
taactacgat  
8881 acgggagcgc ttaccatctg gccccagtgc tgcaatgata ccgagagacc  
cacgctcacc  
8941 ggctccagat ttatcagcaa taaaccagcc agccggaagg gccgagcgc  
gaagtggctc  
9001 tgcaacttta tccgcctcca tccagtctat taattgttgc cgggaagcta  
gagtaagtag  
9061 ttcgccagtt aatagtttgc gcaacgttgt tggcattgct acaggcacgc  
tgggtgctact  
9121 ctcgctggtt ggtatggctt cattcagctc cggttcccaa cgatcaaggc  
gagttacatg  
9181 atccccatg ttgtgcaaaa aagcggtag ctcttcggt cctccgatcg  
ttgtcagaag  
9241 taagttggcc gcagtgttat cactcatggt tatggcagca ctgcataatt  
ctcttactgt  
9301 catgccatcc gtaagatgct tttctgtgac tggtagtac tcaaccaagt  
cattctgaga  
9361 atagtgtatg cggcgaccga gttgctcttg cccggcgtca atacgggata  
atagtgtatc  
9421 acatagcaga actttaaag tgctcatcat tggaaaacgt tcttcggggc  
gaaaactctc  
9481 aaggatctta ccgctgttga gatccagttc gatgtaacct actcgtgcac  
ccaactgatc  
9541 ttcagcatct tttactttca ccagcgtttc tgggtgagca aaaacaggaa  
ggcaaaaatgc  
9601 cgcaaaaaag ggaataaggg cgacacggaa atggtgaata ctcatactct  
tcctttttca  
9661 atgggtaata actgatataa ttaaattgaa gctctaattt gtgagtttag  
tatacatgca  
9721 tttacttata atacagtttt ttagttttgc tggccgcac ttctcaata  
tgcttcccag  
9781 cctgcttttc tgtaacgttc accctctacc ttagcatccc ttccctttgc  
aaatagtctc

9841 cttccaacaa taataatgtc agatcctgta gagaccacat catccacggt  
tctatactgt  
9901 tgaccaaatg cgtctccctt gtcactctaaa cccacaccgg gtgtcataat  
caaccaatcg  
9961 taaccttcat ctcttccacc catgtctctt tgagcaataa agccgataac  
aaaatctttg  
10021 tcgctcttcg caatgtcaac agtaccctta gtatattctc cagtagatag  
ggagcccttg  
10081 catgacaatt ctgctaacat caaaaggcct ctaggttcct ttgttacttc  
ttctgccgcc  
10141 tgcttcaaac cgctaacaat acctggggccc accacaccgt gtgcattcgt  
aatgtctgcc  
10201 cattctgcta ttctgtatac acccgagag tactgcaatt tgactgtatt  
accaatgtca  
10261 gcaaattttc tgtcttcgaa gagtaaaaaa ttgtacttgg cggataatgc  
ctttagcggc  
10321 ttaactgtgc cctccatgga aaaatcagtc aagatatcca catgtgtttt  
tagtaaacaa  
10381 attttgggac ctaatgcttc aactaactcc agtaattcct tggtggtacg  
aacatccaat  
10441 gaagcacaca agtttgtttg cttttcgtgc atgatattaa atagcttggc  
agcaacagga  
10501 ctaggatgag tagcagcacg ttccttatat gtagctttcg acatgattta  
tcttcgtttc  
10561 ctgcaggttt ttgttctgtg cagttggggtt aagaatactg ggcaatttca  
tgtttcttca  
10621 acactacata tgcgtatata taccaatcta agtctgtgct ccttccttcg  
ttcttccttc  
10681 tgttcggaga ttaccgaatc aaaaaaattt caaagaaacc gaaatcaaaa  
aaaagaataa  
10741 aaaaaaaatg atgaattgaa ttgaaaagct agcttatcga tgggtccttt  
tcatcacgtg  
10801 ctataaaaat aattataatt taaatTTTTT aatataaata tataaattaa  
aaatagaaag  
10861 taaaaaaaga aattaaagaa aaaatagttt ttgttttccg aagatgtaaa  
agactctagg  
10921 gggatcgcca acaaatacta ccttttatct tgctcttcct gctctcaggt  
attaatgccg  
10981 aattgtttca tcttgtctgt gtagaagacc acacacgaaa atcctgtgat  
tttacatttt  
11041 acttatcgtt aatcgaatgt atatctattt aatctgcttt tcttgtctaa  
taaatatata  
11101 tgtaaagtac gctttttggt gaaatTTTTT aaacctttgt ttattttttt  
ttcttcattc  
11161 cgtaactctt ctaccttctt tatttacttt ctaaaatcca aatacaaaac  
ataaaaataa  
11221 ataaacacag agtaaattcc caaattattc catcattaa agatacgagg  
cgcgtgtaag  
11281 ttacaggcaa gcgatccgtc cgccggcgaa cgtggcgaga aaggaagggga  
agaaagcgaa  
11341 aggagcgggg gctagggcgg tgggaagtgt aggggtcacg ctgggcgtaa  
ccaccacacc

```
11401 cgccgcgctt aatggggcgc tacagggcgc gtggggatga tccactagta agctt
//
```

LOCUS pCS2 11297 bp DNA circular 17-JUL-2015

SOURCE

ORGANISM

COMMENT This file is created by Vector NTI

http://www.invitrogen.com/

COMMENT VNTDATE|739731711|

COMMENT VNTDBDATE|739732141|

COMMENT LSOWNER|

COMMENT VNTNAME|pCS2|

COMMENT VNTAUTHORNAME|Adam Guss|

COMMENT VNTAUTHORTEL|865-576-0814|

COMMENT VNTAUTHOREML|gussam@ornl.gov|

FEATURES Location/Qualifiers

misc\_feature 3893..3896  
/vntifkey="21"  
/label=loop\of\t1t2

CDS 2647..3297  
/vntifkey="4"  
/label=cat

promoter 1999..2646  
/vntifkey="30"  
/label=P-gapD  
/note="gapD promoter from C. thermocellum"

gene 3315..3860  
/locus\_tag="or0940"  
/colour=16  
/vntifkey="60"

gene complement(5789..6367)  
/locus\_tag="or0326"  
/colour=16  
/vntifkey="60"

CDS complement(5789..6367)  
/locus\_tag="or0326"  
/product="Thymidine kinase"  
/EC\_number="2.7.1.21"  
/codon\_start=1  
/transl\_table=11  
/colour=16  
/vntifkey="4"  
/label=tdk  
/note="CDS 326 - PRIAM: Thymidine kinase PFAM:

thymidine kinase SPTR: Q3CIU6 Thymidine kinase (EC 2.7.1.21).

Thermoanaerobacter pseudethanolicus ATCC 33223. KEGG: tpd:Teth39\_2112

thymidine kinase COGs: COG1435 Thymidine kinase category=F

InterPro IPR001267"

rep\_origin 10624..11142  
/vntifkey="33"  
/label=CEN6/ARSH4  
/note="Yeast origin of replication"

CDS complement(9504..10611)  
/vntifkey="4"  
/label=URA3

```

        /note="yeast gene URA3, which results in ura+, 5-
FOA(Sensitive) when present"
    CDS        complement(8626..9486)
                /vntifkey="4"
                /label=bla
                /note="b-lactamase = ampR"
    rep_origin 5055..5728
                /vntifkey="33"
                /label=pUC\origin
    terminator 4618..4871
                /vntifkey="43"
                /label=CYC1\term
    CDS        complement(8197..8445)
                /vntifkey="4"
                /label=putative\mob/pre\fragment
                /note="cds homologous to a fragment of mob/pre
plasmid proteins involved in mobilization and recombination."
    CDS        complement(7064..8068)
                /gene="repB"
                /codon_start=1
                /transl_table=11
                /product="RepB"
                /protein_id="AA086061.1"
                /db_xref="GI:29650180"
                /vntifkey="4"
                /label=repB
                /note="replication protein; rolling circle
replication initiation protein; Bacillus origin of replication from
Geobacillus stearothermophilus plasmid pTHT15"
    gene       complement(7064..8068)
                /gene="repB"
                /vntifkey="60"
    rep_origin 6989..8523
                /vntifkey="33"
                /label=putative\minimal\C.\thermocellum\ori
                /note="region of pNW33N that is conserved in
pMU770"
    promoter   complement(6368..6988)
                /vntifkey="30"
                /label=P-cbp
                /note="cbp promoter as used by Mascoma (i.e.,
Dan)"
    misc_feature 1..985
                /vntifkey="21"
                /label=Clo1313_0089\upstream\region
                /note="upstream region PCR of Clo1313_0089 (LacI
homolog) for deletion"
    misc_feature 986..1985
                /vntifkey="21"
                /label=Clo1313_0089\downstream\region
    misc_feature 3922..4574
                /vntifkey="21"

```



```

                                /label=Clo1313_0089\internal\region
                                /note="region of homology for gene deletion"
CDS                               3315..3860
                                /locus_tag="or0940"
                                /product="hypoxanthine phosphoribosyltransferase"
                                /EC_number="2.4.2.8"
                                /codon_start=1
                                /transl_table=11
                                /colour=16
                                /vntifkey="4"
                                /label=hpt
                                /note="From Thermoanaerobacterium saccharolyticum
- TIGRFAM: hypoxanthine phosphoribosyltransferase PRIAM: Hypoxanthine
phosphoribosyltransferase PFAM: phosphoribosyltransferase SPTR:
Q3CID6 Hypoxanthine phosphoribosyl transferase (EC 2.4.2.8).
Thermoanaerobacter pseudethanolicus ATCC 33223. KEGG: tpd:Teth39_0300
hypoxanthine phosphoribosyltransferase COGs: COG0634 Hypoxanthine-
guanine phosphoribosyltransferase category=F InterPro
IPR000836:IPR002375:IPR005904"
BASE COUNT      3421 a      2313 c      2042 g      3521 t
ORIGIN
      1 cctatggttc cgcaactttc gtcaaatcca atctcaaggt aatggctctgc
catatcagtc
     61 ggtatatcca ttttggaat tttaacgatt gtattcggct ttatatcttc
cactgctcca
    121 gtaccgtcta tattactttt accgcataa taaatctcat aattcatggt
ttcttcgctg
    181 tccgagctgt ccagtgtaaa ataataccta atcttcacat gctgcaaata
aatttcatca
    241 gatgaactat tattgataac acgaaaatac ggacttataa gggttacatt
gtcatccttc
    301 acattggtga aaaactcgag ctttaaagga acttcctcag cttcacatt
gtacagtgct
    361 ccttcccata ttcccgtaaa aagcattccg gtattataaa caaacaaaat
cgctgttata
    421 actacaacgg aaattataga cttgttttgc ctcaaaactt ttccaatctt
ttctttcatt
    481 ttgaactgcc tccatatcgt tccattggaa tatagctttt tgtggaacta
aaaacagcaa
    541 tttgcacca ataacaacta acacatttca atttgtttga ctattgaaaa
cagacattgc
    601 aatcagtat tatcggtaat ttgcctgcat tacaacagcc tattacttcg
cttttgcttg
    661 aaaagtctgt aaatttaatg tgtttattac attctcggga cattttgaag
aaaaaacgca
    721 aaaatacgaa ctgccaatcc agaaagaatt atcgtcatac aaggccaagt
aattataaat
    781 ctccacattt taattataca ataaattaag ctcttataca atagacataa
aatttgggtt
    841 actgtttacc ttaaattcta tatgcagtca gacaagtaag gttattttaa
gccactcatt

```

901 gaaaaagcat gctaaaatct ttataattta taatataact gaaaagtgtt  
ttgtggagga  
961 taaaatggca aagaaagtca caatgtcagt aaagcgaata ggctgattga  
gcttaacggt  
1021 tgttttaacc tgttatctgg gggtttgta gtggaaatca acattaattc  
agtgtttgaa  
1081 gaattaaaaa atcgggaaat tcttacccea aaaaatgtat ccgacataaa  
gaactatatt  
1141 tcagtccggt atccaaatca ttccccgcaa aaaaagccg caatttttgc  
agatgcggt  
1201 aacaagataa ttaacaaaaa catatcctca ataagcataa cttacagaga  
cggataaga  
1261 aagaccctcc ttagggaaac agtaaaaaaa accccttttg caattaatgc  
aatgacggt  
1321 tatcatgcat gtgtgaacag tggctttaa gaagacaact tcataaatga  
agtttccca  
1381 tgggtgcggga atatattgga aaaccctcac ataaaagatg ctgtcaaaga  
ttacacatta  
1441 aaattaatca gtctcgcaga aactccctct acaatagatg atacagtaaa  
taattcaata  
1501 aacgatacga aatgtgaacc cttaagtcac gacagggaca cagaactttt  
gccggaaaat  
1561 gtatccgggc aagatgttaa aatgccagat gctgaagtaa tcgaagaaat  
ttccgtttca  
1621 gatgacactc ctgttgagtc tgagtatgta agcagcatcg aacttgatgc  
tgcaagcaat  
1681 atacctgata caggcagtac actcggtaaca catgaaaccg gcagtataaa  
aagcgtccct  
1741 ggtataaaaa aaattgtgat tgctgcctcg gcattagttt tgattattac  
atTTTTtctcc  
1801 gttgctttgt ccggcaaact gaaaaaaacg gccggcaccg tacagccaag  
tgccccggaa  
1861 gcaactcctt ccccttcata tgtcagcatt ttcaatagcc tgaacacccc  
ggacgactta  
1921 tatctgaaaa aagccatctt atccaacctg ggctactcca tgggaattca  
cagaaatggt  
1981 cccaactcgc gaggccggcc agtattctga catgggtgta tcaataacc  
atgcttttcc  
2041 gtattgtatc ggaatggttt cggacagggc ggtgggaata gacatggaaa  
agattttttt  
2101 gcccgaggat gcattgataa agtatttctt ttccgaaaga gaggaaaaga  
ttctaaagag  
2161 ttttggaat actgatgaat attgtgtgca gagtacaatt ctatggacaa  
gaaaagaggc  
2221 tttgtcaaaa ctttttcgtc tgggaatgag gatggatttt aaaaagctgg  
atactttgga  
2281 ggacgaggtg gtttttcagg aaacaacag ggcgcgtctg ttttctttta  
tatgcaataa  
2341 ttactgtatc tctctggcat tgccaggttt taataaagat taaaattatt  
gactagaat  
2401 aaaaaaattg tccataatat taatggacaa aaaaacaaag aattacatca  
aaggaagata

2461 aaaatacttt gttaaaaaat taattatfff ttatctaaac tattgaaaat  
gaaaataaaa  
2521 taatataaaa tgaatcatag tgcaagagat acttgccaga ggatgaatat  
tttactgcat  
2581 tcatgcttta tggcagctaa tagaggcatt aaattaaatt ttaatttaca  
ataggaggcg  
2641 atattaatga actttaataa aattgattta gacaattgga agagaaaaga  
gatatttaat  
2701 cattatttga accaacaac gacttttagt ataaccacag aaattgatat  
tagtgtttta  
2761 taccgaaaca taaaacaaga aggatataaa tttaccctg catttatttt  
cttagtgaca  
2821 aggggtgataa actcaaatac agcttttaga actggttaca atagcgacgg  
agagttaggt  
2881 tattgggata agttagagcc actttataca atttttgatg gtgtatctaa  
aacattctct  
2941 ggtatttggga ctctgtaaa gaatgacttc aaagagtttt atgatttata  
cctttctgat  
3001 gtagagaaat ataatggttc ggggaaattg tttcccaaaa cacctatacc  
tgaaaatgct  
3061 ttttctcttt ctattattcc atggacttca tttactgggt ttaacttaa  
tatcaataat  
3121 aatagtaatt accttctacc cattattaca gcaggaaaat tcattaataa  
aggtaattca  
3181 atatatttac cgctatcttt acaggtacat cattctgttt gtgatggtta  
tcatgcagga  
3241 ttgtttatga actctattca ggaattgtca gataggccta atgactggct  
tttataataa  
3301 aggaggtcga cgtcatggaa aatttatcaa aagacatcga tgaaattttg  
atcacagaag  
3361 aagaacttaa ggaaaagata aaagagcttg ggaggcaaat cacaaaagac  
tacaagggga  
3421 aaaatrtgat gttggtagga gttttaaaag gtgctttaat gtttatggct  
gatttgtcaa  
3481 gacacataga tttgccttta tcacttgatt ttatggctgt ttccagctat  
ggaagctcaa  
3541 ctcatcctc aggaatagta aagataatca aagatcttga tataagcata  
gaaggcaaag  
3601 atgttctgat tgtggaagac ataattgaca gcggtttgac tttgtcttac  
ttaagggaaa  
3661 ctttacttgg aaggaagcca aaaagcctga aaatatgcac aatattagac  
aaaccggaga  
3721 gaagagaagc atctgtaaaa gtcgattatg taggatttaa gatacctgat  
aagtttgtcg  
3781 tgggttatgg attggacttt gatgaaaagt acaggaacct tccttttata  
ggcgttttga  
3841 aacctgaaat gtacagctaa gccgggcct cgagaaaaca aaaggctcag  
tcggaagact  
3901 gggccttttg ttttggctacc gagcaagtca aattcaagaa ccgggagcat  
ttgccttatg  
3961 ctctcaaag acaccaaaaa ttccgtaggc ttttttctgt ttattcaata  
cgggtgtggag

4021 tccgaaggca agcgaaacgg tcttaataca atactctatt gttttgacga  
caataaagaa  
4081 tttcagcccc cggtttgcac cagggacggt attgtttccg gaataataac  
tcttgcccg  
4141 atttccagga aaaccgtaag ttccattata agccttaatc ttccgttggt  
aatagtagat  
4201 gatttttttg acgatataaa agcaagctat gtacttaccg ataatctttc  
cggaggttat  
4261 actgccacag aatacctgat caaatcagga cacaggagta taggattttt  
tggagacata  
4321 ttcgcatctc caagcttttt cgacagatac atgggatacc tgaagcaca  
tgtacagtac  
4381 aacctccctg taaacagctc tttttcaatt attgacaaaa atatggctgt  
actgcttcat  
4441 gaaggagttg acaaagtggg tgatgaattg aaaaaattc ctcaactgcc  
cacagccatg  
4501 ttttgctgca acgacgtgga agctatcgcc cttacaagg cattttcggg  
tatgggtata  
4561 tccggtcccc atgacggcgc gcctcagcgt ttaaaccgcg tgatcctaga  
gggcccgcac  
4621 atgtaattag ttatgtcacg cttacattca cgcctcccc ccacatccgc  
tctaaccgaa  
4681 aaggaaggag ttagacaacc tgaagtctag gtcctatatt atttttttat  
agttatgtta  
4741 gtattaagaa cgttatttat atttcaaatt tttctttttt ttctgtacag  
acgcgtgtac  
4801 gcatgtaaca ttatactgaa aaccttgctt gagaaggttt tgggacgctc  
gaaggcttta  
4861 atttgcaagc tgcggccctg cattaatgaa tcggccaacg cgcggggaga  
ggcggtttgc  
4921 gtattgggcg ctcttccgct tcctcgctca ctgactcgct gcgctcggtc  
gttcggctgc  
4981 ggcgagcggg atcagctcac tcaaaggcgg taatacgggt atccacagaa  
tcaggggata  
5041 acgcaggaaa gaacatgtga gcaaaaggcc agcaaaagcc caggaaccgt  
aaaaaggccg  
5101 cgttgctggc gtttttccat aggctccgcc cccctgacga gcatcacaaa  
aatcgacgct  
5161 caagtccagag gtggcgaaac ccgacaggac tataaagata ccaggcgttt  
ccccctggaa  
5221 gctccctcgt gcgctctcct gttccgacct tgccgcttac cggatacctg  
tccgcctttc  
5281 tcccttcggg aagcgtggcg ctttctcata gctcacgctg taggtatctc  
agttcgggtg  
5341 aggtcgttcg ctccaagctg ggctgtgtgc acgaaccccc cgttcagccc  
gaccgctgcg  
5401 ccttatccgg taactatcgt cttgagtcca acccggttaag acacgactta  
tcgccactgg  
5461 cagcagccac tggtaacagg attagcagag cgaggtatgt aggcggtgct  
acagagttct  
5521 tgaagtgggt gcctaactac ggctacacta gaaggacagt atttggatc  
tgcgctctgc

5581 tgaagccagt taccttcgga aaaagagttg gtagctcttg atccggcaaa  
caaaccaccg  
5641 ctggtagcgg tggttttttt gtttgcaagc agcagattac gcgcagaaaa  
aaaggatctc  
5701 aagaagatcc tttgatcttt tctacggggg ctgacgctca gtggaacgaa  
aactcacggt  
5761 aagggatfff ggtcatgaaa aaatccgctt aagtcgcggy gacttcatgg  
cactttctac  
5821 accttgcttc ataagactcc tttgctcaa ccattataat gggatcgtcg  
taattggcag  
5881 gcttcccatt tataagcctt tgcgtgcgag tagcaggatt gccacacttc  
atgcatatag  
5941 cagtaagctt atcgacaaat tcagctatgg ccatcaattc tggagtcgga  
ccaaatgggt  
6001 cacctctaaa gtccatgtca agccctgcac atatgactct tttcccgcta  
tcggcaatct  
6061 cttttacgat gtcgactatt tcagaatcaa aaaattgaac ttcattctata  
gcaaatacat  
6121 ccgtatcttc ttcagcataa gccaatatgt cagaagcctt tactatggca  
atggcgtgca  
6181 tgttgctgcc gttatgagat acgactttgt ctatggaata cctatcgtct  
atagccggtt  
6241 tgaaaacctg aactttttgc ctggcaatct tagctctctt tacccttctt  
ataagttcct  
6301 cactttttcc actgaacatg ggaccagtta caacttctat gtaccctggy  
tctttaggcc  
6361 catacatctt tcgtcctcct taaaattttc gtttatttgt tttttattta  
gtgtgcctaa  
6421 aagcaccatc ttatacatte gtaccttata tctcttatct tgtatctctt  
acctcatatc  
6481 tcttattatt aactaccgaa gtatattttc ataacggaat cttatgactt  
atftttctga  
6541 ctgccgtfff accatacggg taatttatac ggaaacagct aatctaacct  
tgctgaaggc  
6601 atgtttacca aaatattata tctactttac catattaatt caagtgggtca  
ttttgatatt  
6661 ttacgcaaaa atfttttagcg ttcctttact tgataattta tccaaaaacc  
ttcattcgtc  
6721 aaaacaatta tgatataatt aatttatgat atgattaatt aatatttacg  
gataactaat  
6781 catttcaatg caatagatca acatgcaaat caatatccac cttactccga  
acattttgca  
6841 ccaacgaatg cccagcacta tatcccggca agcaatataa cgtctataat  
tttttatgat  
6901 aacgataaaa ttaaatttta tgaaaggggt aaaagcatga gaaaaatagc  
tgtattgtta  
6961 attactttga cgttcttagt cacgactcga atttaggagg cttacttgtc  
tgctttcttc  
7021 attagaatca atcctftttt aaaagtcaat cccgtttggt gaactactct  
ttaataaaat  
7081 aatttttccg ttccaattc cacattgcaa taatagaaaa tccatcttca  
tcggctfttt

7141 cgtcatcatc tgtatgaatc aaatcgcctt cttctgtgtc atcaaggttt  
aattttttat  
7201 gtatttcttt taacaaacca ccataggaga ttaacctttt acgggtgtaaa  
ccttcctcca  
7261 aatcagacaa acgtttcaaa ttcttttctt catcatcggg cataaaatcc  
gtatccttta  
7321 caggatattt tgcagtttcg tcaattgccg attgtatata cgatttatat  
ttatttttcg  
7381 gtcgaatcat ttgaactttt acatttggat catagtctaa tttcattgcc  
tttttccaaa  
7441 attgaatcca ttgtttttga ttcacgtagt tttctgtatt cttaaataa  
gttggtcca  
7501 cacataccaa tacatgcatg tgctgattat aagaattata tttattattt  
attgtcactt  
7561 ccgttgcacg cataaaacca acaagatttt tattaatttt tttatattgc  
atcattcggc  
7621 gaaatccttg agccatatct gacaaactct tattaattc ttcgccatca  
taaacatttt  
7681 taactgttaa tgtgagaaac aaccaacgaa ctgttggctt ttgtttaata  
acttcagcaa  
7741 caaccttttg tgactgaatg ccatgtttca ttgctctcct ccagttgcac  
attggacaaa  
7801 gcctggattt acaaaaccac actcgatata actttctttc gcctgtttca  
cgattttggt  
7861 tatactctaa tatttcagca caatctttta ctctttcagc ctttttaaat  
tcaagaatat  
7921 gcagaagttc aaagtaatca acattagcga ttttcttttc tctccatggg  
ctcacttttc  
7981 cactttttgt cttgtccact aaaacccttg atttttcatc tgaataaatg  
ctactattag  
8041 gacacataat attaaaagaa acccccatct atttagttat ttgtttggtc  
acttataact  
8101 ttaacagatg gggtttttct gtgcaaccaa ttttaagggg tttcaatact  
ttaaacaca  
8161 tacataccaa cacttcaacg cacctttcag caactaaaat aaaaatgacg  
ttatttctat  
8221 atgtatcaag aatagaaaga actcgttttt cgctacgctc aaaacgcaaa  
aaaagcactc  
8281 attcgagtgc tttttcttat cgctccaaat catgcgattt tttcctcttt  
gcttttcttt  
8341 gctcacgaag ttctcgatca cgctgcaaaa catcttgaag cgaaaaagta  
ttcttctttt  
8401 cttccgatcg ctcatgctga cgcacgaaaa gccctctagg cgcataaggaa  
caactcctaa  
8461 atgcatgtga ggggttttct cgtccatgtg aacagtcgca tacgcaatat  
tttgttccc  
8521 atagcggccg cgattatcaa aaaggatctt cacctagatc cttttaaatt  
aaaaatgaag  
8581 ttttaaataca atctaaagta tatatgagta aacttggctc gacagttacc  
aatgcttaat  
8641 cagtgaggca cctatctcag cgatctgtct atttcgttca tccatagttg  
cctgactccc

8701 cgtcgtgtag ataactacga tacgggagcg cttaccatct ggccccagtg  
ctgcaatgat  
8761 accgcgagac ccacgctcac cggctccaga tttatcagca ataaaccagc  
cagccggaag  
8821 ggccgagcgc agaagtggtc ctgcaacttt atccgcctcc atccagtcta  
ttaattgttg  
8881 ccgggaagct agagtaagta gttcgccagt taatagtttg cgcaacgttg  
ttggcattgc  
8941 tacaggcatc gtggtgtcac tctcgtcgtt tggatggct tcattcagct  
ccggttccca  
9001 acgatcaagg cgagttacat gatccccat gttgtgcaaa aaagcggtta  
gctccttcgg  
9061 tcctccgatc gttgtcagaa gtaagttggc cgcagtgtta tcactcatgg  
ttatggcagc  
9121 actgcataat tctcttactg tcatgccatc cgtaagatgc ttttctgtga  
ctggtgagta  
9181 ctcaaccaag tcattctgag aatagtgtat gcggcgaccg agttgctctt  
gcccggcgtc  
9241 aatacgggat aatagtgtat cacatagcag aactttaaaa gtgctcatca  
ttggaaaacg  
9301 ttcttcgggg cgaaaactct caaggatctt accgctgttg agatccagtt  
cgatgtaacc  
9361 cactcgtgca cccaactgat cttcagcatc ttttactttc accagcgttt  
ctgggtgagc  
9421 aaaaacagga aggcaaatg ccgcaaaaaa ggaataagg gcgacacgga  
aatgttgaat  
9481 actcactctc ttcttttttc aatgggtaat aactgatata attaaattga  
agctctaatt  
9541 tgtgagttta gtatacatgc atttacttat aatacagttt tttagttttg  
ctggccgcat  
9601 cttctcaaat atgcttccca gcctgctttt ctgtaacgtt caccctctac  
cttagcatcc  
9661 cttccctttg caaatagtcc tcttccaaca ataataatgt cagatcctgt  
agagaccaca  
9721 tcatccacgg ttctatactg ttgacccaat gcgtctccct tgtcatctaa  
accacaccg  
9781 ggtgtcataa tcaaccaatc gtaaccttca tctcttccac ccatgtctct  
ttgagcaata  
9841 aagccgataa caaaatcttt gtcgctcttc gcaatgtcaa cagtaccctt  
agtatattct  
9901 ccagtagata gggagccctt gcatgacaat tctgctaaca tcaaaaggcc  
tctaggttcc  
9961 tttgttactt cttctgccgc ctgcttcaaa ccgctaacaa tacctgggcc  
caccacaccg  
10021 tgtgcattcg taatgtctgc ccattctgct attctgtata caccgcgaga  
gtactgcaat  
10081 ttgactgtat taccaatgtc agcaaatttt ctgtcttcga agagtaaaaa  
attgtacttg  
10141 gcggataatg cctttagcgg cttaactgtg ccctccatgg aaaaatcagt  
caagatatcc  
10201 acatgtgttt ttagtaaaca aatthtggga cctaagtctt caactaactc  
cagtaattcc

10261 ttggtggtac gaacatccaa tgaagcacac aagtttgttt gcttttcgtg  
catgatatta  
10321 aatagcttgg cagcaacagg actaggatga gtagcagcac gttccttata  
tgtagctttc  
10381 gacatgattt atcttcgttt cctgcagggt tttgttctgt gcagttgggt  
taagaatact  
10441 gggcaatttc atgtttcttc aacactacat atgcgtatat ataccaatct  
aagtctgtgc  
10501 tccttccttc gttcttcctt ctgttcggag attaccgaat caaaaaaatt  
tcaaagaaac  
10561 cgaaatcaaa aaaaagaata aaaaaaaaaat gatgaattga attgaaaagc  
tagcttatcg  
10621 atgggtcctt ttcatcacgt gctataaaaa taattataat ttaaattttt  
taatataaat  
10681 atataaatta aaaatagaaa gtaaaaaaag aaattaaaga aaaaatagtt  
tttgttttcc  
10741 gaagatgtaa aagactctag ggggatcgcc aacaataact accttttatac  
ttgctcttcc  
10801 tgctctcagg tattaatgcc gaattgtttc atcttgtctg tgtagaagac  
cacacacgaa  
10861 aatcctgtga ttttacattt tacttatcgt taatcgaatg tatatctatt  
taatctgctt  
10921 ttcttgtcta ataaatatat atgtaaagta cgctttttgt tgaattttt  
taaacccttg  
10981 tttatTTTTT tttcttcatt ccgtaactct tctaccttct ttatttactt  
tctaaaatcc  
11041 aaatacaaaa cataaaaata aataaacaca gagtaaattc ccaaattatt  
ccatcattaa  
11101 aagatacgag gcgctgtgtaa gttacaggca agcgatccgt ccgccggcga  
acgtggcgag  
11161 aaaggaaggg aagaaagcga aaggagcggg ggctagggcg gtgggaagtg  
taggggtcac  
11221 gctgggcgta accaccacac ccgccgcgct taatggggcg ctacagggcg  
cgtggggatg  
11281 atccactagt aagcttg

//



LOCUS pAMG488 11526 bp DNA circular 17-JUL-2015  
 SOURCE  
 ORGANISM  
 COMMENT This file is created by Vector NTI  
 http://www.invitrogen.com/  
 COMMENT VNTDATE|739732178|  
 COMMENT VNTDBDATE|739732293|  
 COMMENT LSOWNER|  
 COMMENT VNTNAME|pAMG488|  
 COMMENT VNTAUTHORNAME|Adam Guss|  
 COMMENT VNTAUTHORTEL|865-576-0814|  
 COMMENT VNTAUTHOREML|gussam@ornl.gov|  
 FEATURES Location/Qualifiers  
 misc\_feature 8562..9578  
 /vntifkey="21"  
 /label=Clo1313\_0396\downstream\region  
 /note="for deletion, leaving TGA stop site  
 behind"  
 misc\_feature 7560..8561  
 /vntifkey="21"  
 /label=Clo1313\_0396\upstream\region  
 /note="for deletion, removing putative -35 -10  
 sequences"  
 gene 10913..11458  
 /locus\_tag="or0940"  
 /colour=16  
 /vntifkey="60"  
 promoter complement(2625..3245)  
 /vntifkey="30"  
 /label=P-cbp  
 /note="cbp promoter as used by Mascoma (i.e.,  
 Dan)"  
 rep\_origin 3246..4780  
 /vntifkey="33"  
 /label=putative\minimal\C.\thermocellum\ori  
 /note="region of pNW33N that is conserved in  
 pMU770"  
 gene complement(3321..4325)  
 /gene="repB"  
 /vntifkey="60"  
 CDS complement(3321..4325)  
 /gene="repB"  
 /codon\_start=1  
 /transl\_table=11  
 /product="RepB"  
 /protein\_id="AA086061.1"  
 /db\_xref="GI:29650180"  
 /vntifkey="4"  
 /label=repB  
 /note="replication protein; rolling circle  
 replication initiation protein; Bacillus origin of replication from  
 Geobacillus stearothermophilus plasmid pTHT15"

```

CDS complement(4454..4702)
/vntifkey="4"
/label=putative\mob/pre\fragment
/note="cds homologous to a fragment of mob/pre
plasmid proteins involved in mobilization and recombination."
promoter 9597..10244
/vntifkey="30"
/label=P-gapD
/note="gapD promoter from C. thermocellum"
CDS 10245..10895
/vntifkey="4"
/label=cat
terminator 875..1128
/vntifkey="43"
/label=CYC1\term
rep_origin 1312..1985
/vntifkey="33"
/label=pUC\origin
CDS complement(4883..5743)
/vntifkey="4"
/label=bla
/note="b-lactamase = ampR"
CDS complement(5761..6868)
/vntifkey="4"
/label=URA3
/note="yeast gene URA3, which results in ura+, 5-
FOA(Sensitive) when present"
rep_origin 6881..7399
/vntifkey="33"
/label=CEN6/ARSH4
/note="Yeast origin of replication"
CDS complement(2046..2624)
/locus_tag="or0326"
/product="Thymidine kinase"
/EC_number="2.7.1.21"
/codon_start=1
/transl_table=11
/colour=16
/vntifkey="4"
/label=tdk
/note="CDS 326 - PRIAM: Thymidine kinase PFAM:
thymidine kinase SPTR: Q3CIU6 Thymidine kinase (EC 2.7.1.21).
Thermoanaerobacter pseudethanolicus ATCC 33223. KEGG: tpd:Teth39_2112
thymidine kinase COGs: COG1435 Thymidine kinase category=F
InterPro IPR001267"
gene complement(2046..2624)
/locus_tag="or0326"
/colour=16
/vntifkey="60"
misc_feature 11491..11494
/vntifkey="21"
/label=loop\of\t1t2

```

```

misc_feature      1..838
                  /vntifkey="21"
                  /label=Clo1313_0396\internal\region
                  /note="region of homology for gene deletion"
CDS               10913..11458
                  /locus_tag="or0940"
                  /product="hypoxanthine phosphoribosyltransferase"
                  /EC_number="2.4.2.8"
                  /codon_start=1
                  /transl_table=11
                  /colour=16
                  /vntifkey="4"
                  /label=hpt
                  /note="From Thermoanaerobacterium saccharolyticum
- TIGRFAM: hypoxanthine phosphoribosyltransferase PRIAM: Hypoxanthine
phosphoribosyltransferase PFAM: phosphoribosyltransferase SPTR:
Q3CID6 Hypoxanthine phosphoribosyl transferase (EC 2.4.2.8).
Thermoanaerobacter pseudethanolicus ATCC 33223. KEGG: tpd:Teth39_0300
hypoxanthine phosphoribosyltransferase COGs: COG0634 Hypoxanthine-
guanine phosphoribosyltransferase category=F InterPro
IPR000836:IPR002375:IPR005904"
BASE COUNT      3515 a      2221 c      2250 g      3540 t
ORIGIN
      1 agattctggc agtgataaaa gaaaaaaatt atgttccgat agcgccggca
cggcgtttgg
     61 ccgggataga cagcaatata attggcctgt ttgttttggga tattgacata
tctgagtcaa
    121 agtcaagggt ctcggaagt acatactttt cacggctgat aaatctgata
atagaccagg
    181 caaacaattt tggctttcaa gtattggtgt caattataac ttcacagaaa
cagctgagtg
    241 aaattagaaa tctcttcatg agcagaacca ttttcagcgg catttttatc
ggtgcgttca
    301 atgatgaaat ccaacttgat gatgatatta taatgcaaca tcccacaatt
attattgacc
    361 gccaatcaga aaggatggtg aaaaagccaa acagattggt tgtaaacctg
gacaactttg
    421 agggtgctta taatgcgaca cagtttttga ttaaattggg gcataccaga
attgggcaca
    481 tatccgggga ccttagaaaa ctttcgggca tagaacgcta tgaaggatac
aaaaaagcat
    541 tggaagatgc aggattaggt tttgacaaaa atttggttcg tgaagggaac
ttccttgatg
    601 acagcggcta taggcttgca cgtgagatat taaaagagaa cgtgacggct
atthttctgtg
    661 ccaatgatgt aatggcaatt agtgcaatta aagccataaa agaaacgggt
ttgagtgtac
    721 cggatgatat atctgtaata ggctttgata atacagcaat cggaattat
atcatgcctg
    781 cattgacaac tgtgaacgcg ccgttggagc atattgcaga agcatgtatt
gagtcattcc

```

841 tcagcgttta aaccgctga tcctagaggg cgcacatcatg taattagtta  
tgtcacgctt  
901 acattcacgc cctcccccca catccgctct aaccgaaaag gaaggagtta  
gacaacctga  
961 agtctaggtc cctatattatt tttttatagt tatgtagta ttaagaacgt  
tatttatatt  
1021 tcaaattttt cttttttttc tgtacagacg cgtgtacgca tgtaacatta  
tactgaaaac  
1081 cttgcttgag aaggttttgg gacgctcgaa ggctttaatt tgcaagctgc  
ggccctgcat  
1141 taatgaatcg gccaacgcgc ggggagaggg ggtttgcgta ttgggcgctc  
ttccgcttcc  
1201 tcgctcactg actcgctgcg ctcggtcggt cggctgcggc gagcggatc  
agctcactca  
1261 aaggcggtaa tacggttatc cacagaatca ggggataacg caggaaagaa  
catgtgagca  
1321 aaaggccagc aaaagcccag gaaccgtaaa aaggccgcgt tgctggcggt  
tttccatagg  
1381 ctccgcccc ctgacgagca tcacaaaaat cgacgctcaa gtcagaggtg  
gcgaaaccg  
1441 acaggactat aaagatacca ggcgtttccc cctggaagct ccctcgctgcg  
ctctcctggt  
1501 ccgaccctgc cgcttaccgg atacctgtcc gcctttctcc cttcgggaag  
cgtggcgctt  
1561 tctcatagct cacgctgtag gtatctcagt tcggtgtagg tcgttcgctc  
caagctgggc  
1621 tgtgtgcacg aacccccgt tcagcccgac cgctgcgcct tatccggtaa  
ctatcgtctt  
1681 gagtccaacc cggtaagaca cgacttatcg cactggcag cagccactgg  
taacaggatt  
1741 agcagagcga ggtatgtagg cggtgctaca gagttcttga agtgggtggc  
taactacggc  
1801 tacactagaa ggacagtatt tggatctgc gctctgctga agccagttac  
cttcggaaaa  
1861 agagtggta gctcttgatc cggcaaaaa accaccgctg gtagcgggtg  
ttttttggt  
1921 tgcaagcagc agattacgcg cagaaaaaaaa ggatctcaag aagatccttt  
gatctttct  
1981 acggggctctg acgctcagtg gaacgaaaac tcacgttaag ggattttggt  
catgaaaaaa  
2041 tccgcttaag tccgcgggac ttcattggcac tttctacacc ttgcttcata  
agactccttt  
2101 gctccaacca ttataatggg atcgtcgtaa ttggcaggct tcccatttat  
aagcctttgc  
2161 gtgagtagtag caggattgcc acacttcatg catatagcag taagcttata  
gacaaattca  
2221 gctatggcca tcaattctgg agtcggacca aatggttcac ctctaaagtc  
catgtcaagc  
2281 cctgcacata tgactctttt cccgctatcg gcaatctctt ttacgatgct  
gactatttca  
2341 gaatcaaaaa attgaacttc atctatagca aatacatccg tatcttcttc  
agcataagcc

2401 aatatgtcag aagcctttac tatggcaatg gcgtgcatgt tgtcgcggtt  
atgagatacg  
2461 actttgtcta tggaatacct atcgtctata gccggtttga aaacctgaac  
tttttgctg  
2521 gcaatcttag ctctctttat ccttcttata agttcctcac tttttccact  
gaacatggga  
2581 ccagttacaa cttctatgta cccgtggtct ttaggcccat acatctttcg  
tcctccttaa  
2641 aattttcggt tatttgtttt ttatttagtg tgcctaaaag caccatctta  
tacattcgta  
2701 ccttatact cttatcttgt atctcttacc tcatatctct tattattaac  
taccgaagta  
2761 tattttcata acggaatctt atgacttatt tttctgactg ccgttttacc  
atacggttaa  
2821 tttatacggga aacagctaat ctaaccttgc tgaaggcatg tttaccaaaa  
tattatatct  
2881 actttaccat attaattcaa gtggtcattt tgatatttta cgccaaaatt  
tttagcgttc  
2941 ctttacttga taatttatcc aaaaaccttc attcgtcaaa acaattatga  
tataattaat  
3001 ttatgatatg attaattaat atttacggat aactaatcat ttcaatgcaa  
tagatcaaca  
3061 tgcaaatcaa tatccacctt actccgaaca ttttgcacca acgaatgcc  
agcactatat  
3121 cccggcaagc aatataacgt ctataatfff ttatgataac gataaaatta  
aattttatga  
3181 aaggggtaaa agcatgagaa aaatagctgt attgttaatt actttgacgt  
tcttagtcac  
3241 gactcgaatt taggaggctt acttgtctgc tttcttcatt agaatcaatc  
cttttttaaa  
3301 agtcaatccc gtttgttgaa ctactcttta ataaaataat ttttccgttc  
ccaattccac  
3361 attgcaataa tagaaaatcc atcttcatcg gctttttcgt catcatctgt  
atgaatcaaa  
3421 tcgccttctt ctgtgtcatc aaggtttaat tttttatgta tttcttttaa  
caaaccacca  
3481 taggagatta accttttacg gtgtaaact tcctccaaat cagacaaacg  
tttcaaattc  
3541 ttttcttcat catcggtcac aaaatccgta tcctttacag gatattttgc  
agtttcgtca  
3601 attgccgatt gtatatccga tttatattta tttttcggtc gaatcatttg  
aacttttaca  
3661 tttggatcat agtctaattt cattgccttt ttccaaaatt gaatccattg  
tttttgattc  
3721 acgtagtttt ctgtattctt aaaataagtt ggtccacac ataccaatac  
atgcatgtgc  
3781 tgattataag aattatcttt attatttatt gtcacttccg ttgcacgcat  
aaaaccaaca  
3841 agatttttat taattttttt atattgcatc attcggcgaa atccttgagc  
catatctgac  
3901 aaactcttat ttaattcttc gccatcataa acatttttaa ctgttaatgt  
gagaacaac

3961 caacgaactg ttggcttttg ttttaataact tcagcaacaa ccttttgtga  
ctgaatgcc  
4021 tgtttcattg ctctcctcca gttgcacatt ggacaaagcc tggatttaca  
aaaccacact  
4081 cgatacaact ttctttcgcc tgtttcacga ttttgtttat actctaatat  
ttcagcacia  
4141 tcttttactc tttcagcctt tttaaattca agaatatgca gaagttcaaa  
gtaatcaaca  
4201 ttagcgattt tcttttctct ccatggctct acttttccac tttttgtctt  
gtccactaaa  
4261 acccttgatt tttcatctga ataaatgcta ctattaggac acataatatt  
aaaagaaacc  
4321 cccatctatt tagttatttg tttggctact tataacttta acagatgggg  
tttttctgtg  
4381 caaccaattt taagggtttt caatacttta aaacacatac ataccaacac  
ttcaacgcac  
4441 ctttcagcaa ctaaaataaa aatgacgta tttctatatg tatcaagaat  
agaaagaact  
4501 cgtttttcgc tacgctcaaa acgcaaaaaa agcactcatt cgagtgcttt  
ttcttatcgc  
4561 tccaaatcat gcgatttttt cctctttgct tttctttgct cacgaagttc  
tcgatcacgc  
4621 tgcaaaacat cttgaagcga aaaagtattc ttcttttctt ccgatcgctc  
atgctgacgc  
4681 acgaaaagcc ctctaggcgc ataggaacaa ctctaaatg catgtgaggg  
gttttctcgt  
4741 ccatgtgaac agtcgcatac gcaatatttt gtttccata gcggccgoga  
ttatcaaaaa  
4801 ggatcttcac ctatagcctt ttaaattaaa aatgaagttt taaatcaatc  
taaagtatat  
4861 atgagtaaac ttggtctgac agttaccaat gcttaatcag tgaggcacct  
atctcagcga  
4921 tctgtctatt tcgttcatcc atagttgcct gactccccgt cgtgtagata  
actacgatac  
4981 gggagcgtt accatctggc cccagtgtg caatgatacc gcgagacca  
cgctcaccgg  
5041 ctccagattt atcagcaata aaccagccag ccggaagggc cgagcgcaga  
agtggctctg  
5101 caactttatc cgcctccatc cagtctatta attggtgccc ggaagctaga  
gtaagtagtt  
5161 cgccagttaa tagtttgccc aacgttggtg gcattgctac aggcacgtg  
gtgtcactct  
5221 cgtcgtttgg tatggcttca ttcagctccg gttcccaacg atcaaggcga  
gttacatgat  
5281 cccccatggt gtgcaaaaaa gcggttagct ccttcgggtcc tccgatcgtt  
gtcagaagta  
5341 agttggcccgc agtggtatca ctcatgggta tggcagcact gcataattct  
cttactgtca  
5401 tgccatccgt aagatgcttt tctgtgactg gtgagtactc aaccaagtca  
ttctgagaat  
5461 agtgtatgcg gcgaccgagt tgctcttgcc cggcgtcaat acgggataat  
agtgtatcac

5521 atagcagaac tttaaaagtg ctcatcattg gaaaacgttc ttcggggcga  
aaactctcaa  
5581 ggatcttacc gctggtgaga tccagttcga tgtaaccac tcgtgcaccc  
aactgatctt  
5641 cagcatcttt tactttcacc agcgtttctg ggtgagcaaa aacaggaagg  
caaaatgccg  
5701 caaaaagg g aataagggcg acacggaaat gttgaatact catactcttc  
ctttttcaat  
5761 gggtaataac tgatataatt aaattgaagc tctaatttgt gagtttagta  
tacatgcatt  
5821 tacttataat acagtttttt agttttgctg gccgcatctt ctcaaatatg  
cttcccagcc  
5881 tgcttttctg taacgttcac cctctacctt agcatccctt ccctttgcaa  
atagtcctct  
5941 tccaacaata ataatgtcag atcctgtaga gaccacatca tccacggttc  
tatactgttg  
6001 acccaatgcy tctcccttgt catctaaacc cacaccgggt gtcataatca  
accaatcgta  
6061 accttcatct cttccacca tgtctctttg agcaataaag ccgataacaa  
aatctttgtc  
6121 gctcttcgca atgtcaacag tacccttagt atattctcca gtagataggg  
agcccttgca  
6181 tgacaattct gctaacaatca aaaggcctct aggttccttt gttacttctt  
ctgccgctg  
6241 cttcaaaccg ctaacaatac ctgggcccac cacaccgtgt gcattcgtaa  
tgtctgccc  
6301 ttctgctatt ctgtatacac ccgcagagta ctgcaatttg actgtattac  
caatgtcagc  
6361 aaattttctg tcttcgaaga gtaaaaaatt gtacttggcg gataatgcct  
ttagcggctt  
6421 aactgtgccc tccatggaaa aatcagtcaa gatatccaca tgtgttttta  
gtaaacaat  
6481 tttgggacct aatgcttcaa ctaactccag taattccttg gtggtacgaa  
catccaatga  
6541 agcacacaag tttgtttgct tttcgtgcat gatattaaat agcttggcag  
caacaggact  
6601 aggatgagta gcagcacggt ccttatatgt agctttcgac atgatttatc  
ttcgtttcct  
6661 gcaggttttt gttctgtgca gttgggttaa gaatactggg caatttcatg  
tttcttcaac  
6721 actacatatg cgtatatata ccaatctaag tctgtgctcc ttccttcggt  
cttccttctg  
6781 ttcggagatt accgaatcaa aaaaatttca aagaaaccga aatcaaaaaa  
aagaataaaa  
6841 aaaaaatgat gaattgaatt gaaaagctag cttatcgatg ggtccttttc  
atcacgtgct  
6901 ataaaaataa ttataattta aattttttaa tataaatata taaattaa  
atagaaagta  
6961 aaaaaagaaa ttaaagaaaa aatagttttt gttttccgaa gatgtaaaag  
actctagggg  
7021 gatcgccaac aaatactacc ttttatcttg ctcttcctgc tctcaggtat  
taatgccgaa

7081 ttgtttcatc ttgtctgtgt agaagaccac acacgaaaat cctgtgattt  
tacattttac  
7141 ttatcgtaa tcgaatgtat atctatttaa tctgcttttc ttgtctaata  
aatatataatg  
7201 taaagtacgc tttttggtga aattttttaa acctttgttt atttttttt  
cttcattccg  
7261 taactcttct accttcttta tttactttct aaaatccaaa tacaaaacat  
aaaaataaat  
7321 aaacacagag taaattccca aattattcca tcattaaag atacgaggcg  
cgtgtaagtt  
7381 acaggcaagc gatccgtccg ccggcgaacg tggcgagaaa ggaaggggaag  
aaagcgaag  
7441 gagcgggggc tagggcggtg ggaagtgtag gggtcacgct gggcgtaacc  
accacaccg  
7501 ccgcgcttaa tggggcgcta cagggcgcgt ggggatgatc cactagtaag  
cttggatcca  
7561 ttacggagaa ggacattgaa actattgcag aagcagggtt tgaccatgtc  
agactgcctt  
7621 ttgattatcc aattatcgag tctgatgaca atgtgggaga atataaagaa  
gatgggcttt  
7681 cttatattga ccggtgcctt gagtgggtgta aaaaatacaa tttggggctt  
gtgttgata  
7741 tgcacacgc tcccgggtac cgctttcaag attttaagac aagcaccttg  
tttgaagatc  
7801 cgaaccagca aaagagattt gttgacatat ggagattttt agccaagcgt  
tacataaatg  
7861 aacgggaaca tattgccttt gaactgttaa atgaagttgt tgagcctgac  
agtaccgct  
7921 ggaacaagtt gatgcttgag tgtgtaaaag caatcagggga aattgattcc  
accaggtggc  
7981 tttacattgg gggcaataac tataacagtc ctgatgagct taaaaacctt  
gcagatattg  
8041 atgatgatta catagtttac aatttccatt tttacaatcc ttttttctt  
acgcatcaga  
8101 aagcccactg gtcggaaagt gccatggcgt acaacaggac tgtaaaatat  
ccgggacaat  
8161 atgagggaaat tgaagagttt gtgaaaaata atcctaagta cagttttatg  
atggaattga  
8221 ataacctgaa gctgaataaa gagcttttgc gcaaagattt aaaaccagca  
attgagttca  
8281 gggaaaagaa aaaatgcaaa ctatattgcg gggagtttg gtaattgcc  
attgctgacc  
8341 tggagtccag gataaaatgg catgaagatt atataagtct tctagaggag  
tatgatatcg  
8401 gcggcgcggt gtggaactac aaaaaaatgg attttgaaat ttataatgag  
gatagaaaac  
8461 ctgtctcgca agaattggta aatatactgg cgagaagaaa aacttgatta  
ttaaactac  
8521 atttttgcaa aagtttgtaa tttaaaaaat acaacagctg ttgattgatt  
gttttataat  
8581 catccaaaga tgtactcgga tacatataat tggggtaata attaccctg  
aggatattat



8641 tataaataaa aaaaatatgc aggagggtga aaaatgtata aaagattatt  
gtcgtcagta  
8701 ctgataatta tgctgttatt atcagcctgg tcgccaatat ccgtaacaagc  
ttctgatgga  
8761 atcaatgaca ttagagggtca ttgggctgaa gaagacttga acaaatggat  
ggaaaaaggt  
8821 attttgggtgg gctaccagga tgggacgata aggcccgata ataatatcac  
aagagccgaa  
8881 tttgtcacat taattaacaa ggttttcggg ctttatgaat taagccggga  
gcaattcgca  
8941 gatggtgaag actcaaatg gtattcccgt gaaatattaa aagccagggc  
tgcgggatat  
9001 attgcaggtt atggaagcaa tgttttcaaa cctgacaatt atattacaag  
acaagaagcc  
9061 gttgttataa tcgcgaaagt ttttgaactt caaagcggca gcaattatac  
aagcaagttt  
9121 aaagatggaa gtctggtaaa ggaatacgc aaagattccg ttagcgcggt  
ggttgaaaaa  
9181 ggctacatag caggttatga agatggcact ttcaggccgg acaactacat  
taccctgca  
9241 gaaacaataa aaattctgaa taaaattatt ccttccttgt ataacgagaa  
aggagattat  
9301 aaaaatgaag aagtagccgg aaacgctctg attaacaccg aaggagttat  
tttaaagat  
9361 accgtaataa acggggattt gtatcttgct caggaattc agaacggcga  
tgttaccctt  
9421 gacgggtgta atgtaaaagg aacggttttc gtaaattggtg gaggaagcga  
cagcatacat  
9481 tttataaata cgaaaataaa cagggttggt gtcaataaaa caggagttag  
aattgtaact  
9541 tccggcaata cctcggttga aagtgttgtc gttaaactcg atcctcgcga  
ggccggccag  
9601 tattctgaca tgggtgtatc aataacccat gcgtttccgt attgtatcgg  
aatggtttcg  
9661 gacagggcgg tgggaataga catggaaaag attttttgc ccgaggatgc  
attgataaag  
9721 tatttctttt ccgaaagaga ggaaaagatt ctaaagagtt ttggaaatac  
tgatgaatat  
9781 tgtgtgcaga gtacaattct atggacaaga aaagaggctt tgtcaaaact  
ttttcgtctg  
9841 ggaatgagga tggattttta aaagctggat actttggagg acgaggtggt  
ttttcaggaa  
9901 acaaacaggg cgcgtctggt ttcttttata tgcaataatt actgtatctc  
tctggcattg  
9961 ccaggtttta ataaagatta aaattattga ctagaataa aaaaattgct  
cataatatta  
10021 atggacaaaa aaacaagaa ttacatcaaa ggaagataaa aatactttgt  
taaaaaatta  
10081 attatttttt atctaaacta ttgaaaatga aaataaaata atataaatg  
aatcatagtg  
10141 caagagatac ttgccagagg atgaatattt tactgcattc atgctttatg  
gcagctaata

10201 gaggcattaa attaaatfff aatttacaat aggaggcgat attaataaac  
ttaataaaaa  
10261 ttgatttaga caattggaag agaaaagaga tatttaataca ttatttgaac  
caacaaacga  
10321 ctttttagtat aaccacagaa attgatatta gtgttttata ccgaaacata  
aaacaagaag  
10381 gatataaatt ttaccctgca tttatfffct tagtgacaag ggtgataaac  
tcaaatacag  
10441 ctttttagaac tggttacaat agcgacggag agttaggtta ttgggataag  
ttagagccac  
10501 tttatacaat ttttgatggt gtatctaaaa cattctctgg tatttggact  
cctgtaaaga  
10561 atgacttcaa agagttttat gatttatacc tttctgatgt agagaaatat  
aatggttcgg  
10621 ggaaattggt tcccaaaaca cctatacctg aaaatgcttt ttctctttct  
attattccat  
10681 ggacttcatt tactggggtt aacttaata tcaataataa tagtaattac  
cttctacca  
10741 ttattacagc aggaaaattc attaataaag gtaattcaat atatttaccg  
ctatctttac  
10801 aggtacatca ttctgtttgt gatggttatc atgcaggatt gtttatgaac  
tctattcagg  
10861 aattgtcaga taggcctaata gactggcttt tataataaag gaggtcgacg  
tcatggaaaa  
10921 tttatcaaaa gacatcgatg aaatfffat cacagaagaa gaacttaagg  
aaaagataaa  
10981 agagcttggg aggcaaatca caaaagacta caaagggaaa aatttgatgt  
tggtaggagt  
11041 tttaaaagggt gctttaatgt ttatggctga tttgtcaaga cacatagatt  
tgcctttatc  
11101 acttgatfff atggctgfff ccagctatgg aagctcaact cattcatcag  
gaatagtaaa  
11161 gataatcaaa gatcttgata taagcataga aggcaaagat gttctgattg  
tggagacat  
11221 aattgacagc ggtttgactt tgtcttactt aagggaaact ttacttggaa  
ggaagccaaa  
11281 aagcctgaaa atatgcacaa tattagacaa accggagaga agagaagcat  
ctgtaaaagt  
11341 cgattatgta ggatttaaga tacctgataa gtttgtcgtg ggttatggat  
tggactttga  
11401 tgaaaagtac aggaaccttc cttttatagg cgttttgaaa cctgaaatgt  
acagctaagc  
11461 ccgggctcgc agaaaacaaa aggctcagtc ggaagactgg gcctfffgtt  
ttggtaccga  
11521 attcgg  
//
